# Supplementary material for: Impact of Governmental interventions on epidemic progression and workplace activity during the COVID-19 outbreak
Source: PubMed Central journal article supplement (PMC8578600; doi:10.1038/s41598-021-01276-5), 2021-11-09
Supplement: 41598_2021_1276_MOESM1_ESM.pdf [file 41598_2021_1276_MOESM1_ESM.pdf]

# Impact of Governmental interventions on epidemic progression and workplace activity during the COVID-19 outbreak

Sumit Kumar Ram<sup>1\*</sup> and Didier Sornette<sup>1-6\*</sup>

<sup>1</sup> ETH Zurich, Department of Management Technology and Economics

<sup>2</sup> ETH Zurich, Department of Earth Sciences

<sup>3</sup> ETH Zurich, Department of Physics  
Zurich, Switzerland

<sup>4</sup> Swiss Finance Institute, c/o University of Geneva  
Geneva, Switzerland

<sup>5</sup> Institute of Risk Analysis, Prediction and Management (Risks-X)  
Academy for Advanced Interdisciplinary Studies

Southern University of Science and Technology (SUSTech), Shenzhen, 518055, China

<sup>6</sup> Tokyo Tech World Research Hub Initiative, Institute of Innovative Research  
Tokyo Institute of Technology, Tokyo, Japan

\*To whom correspondence should be addressed; E-mail: sram@ethz.ch, dsornette@ethz.ch

# Supplementary Materials

## 6 Supporting figures

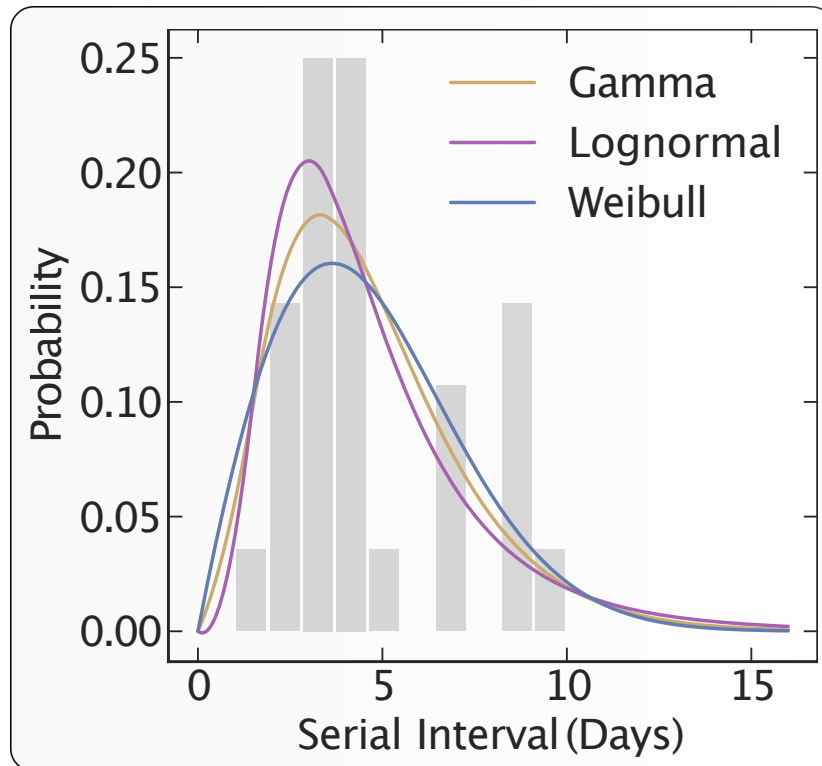

Figure S1: **Generation time distribution:** The distribution of the serial intervals are calibrated with 3 different models, i.e, Gamma, Log-normal and Weibull and using maximum likelihood estimation. We find the most suitable model for the generation time distribution by comparing the log-likelihood scores of the above models. We observe that the log-normal distribution gives the best fitting with  $\mu = 4.6$  and  $\sigma = 2.8$ . The grey bars represents the empirical observations and the three fitted models are presented as solid lines.

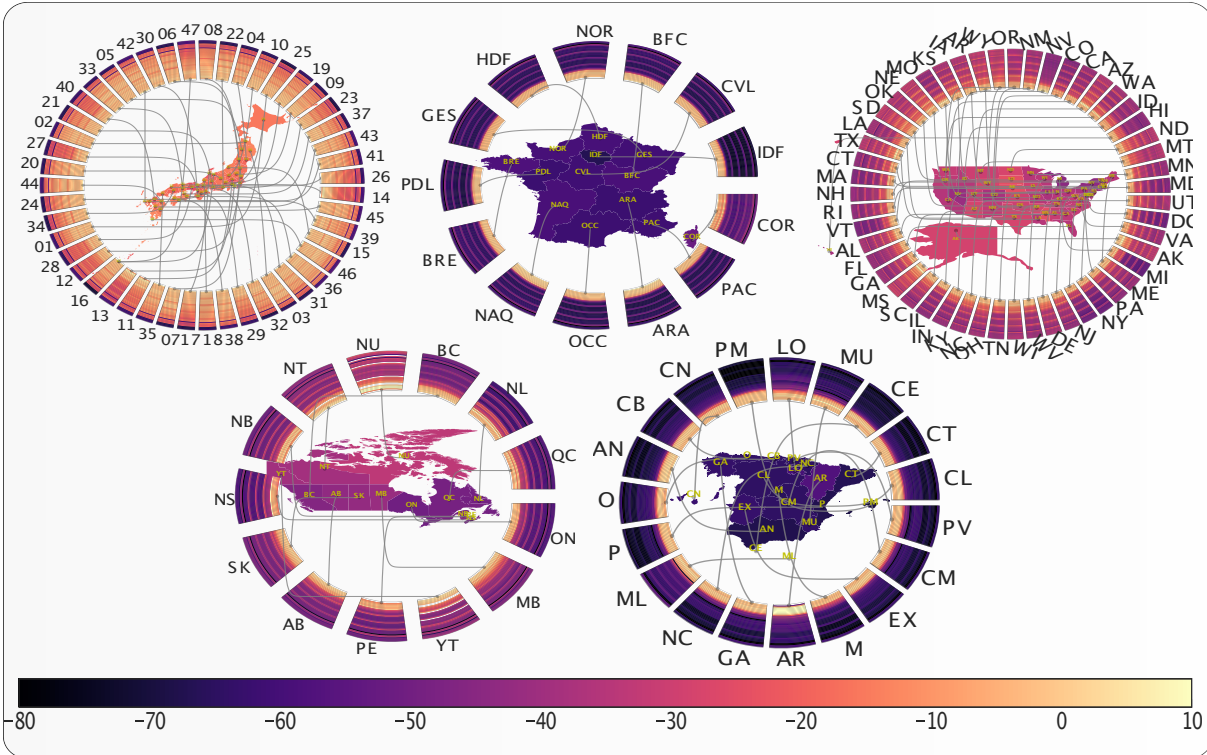

**Figure S2: Time evolution of mobility and impact of travel restriction on mobility in five countries.** Each subplot shows the time evolution of mobility and impact of travel restrictions on mobility of different top level administrative divisions of a country. The countries are, for top left to bottom right: Japan, France, USA, Canada, and Spain. The color of the regions on the map denoted by their ISO 3166-2 code represent the impact (increase or decrease of mobility) of travel restriction on that region. The radial connected wedges represent the time evolution of the mobility in the corresponding region or state for each country. The color of the strips in the wedges represent the mobility on a particular day.

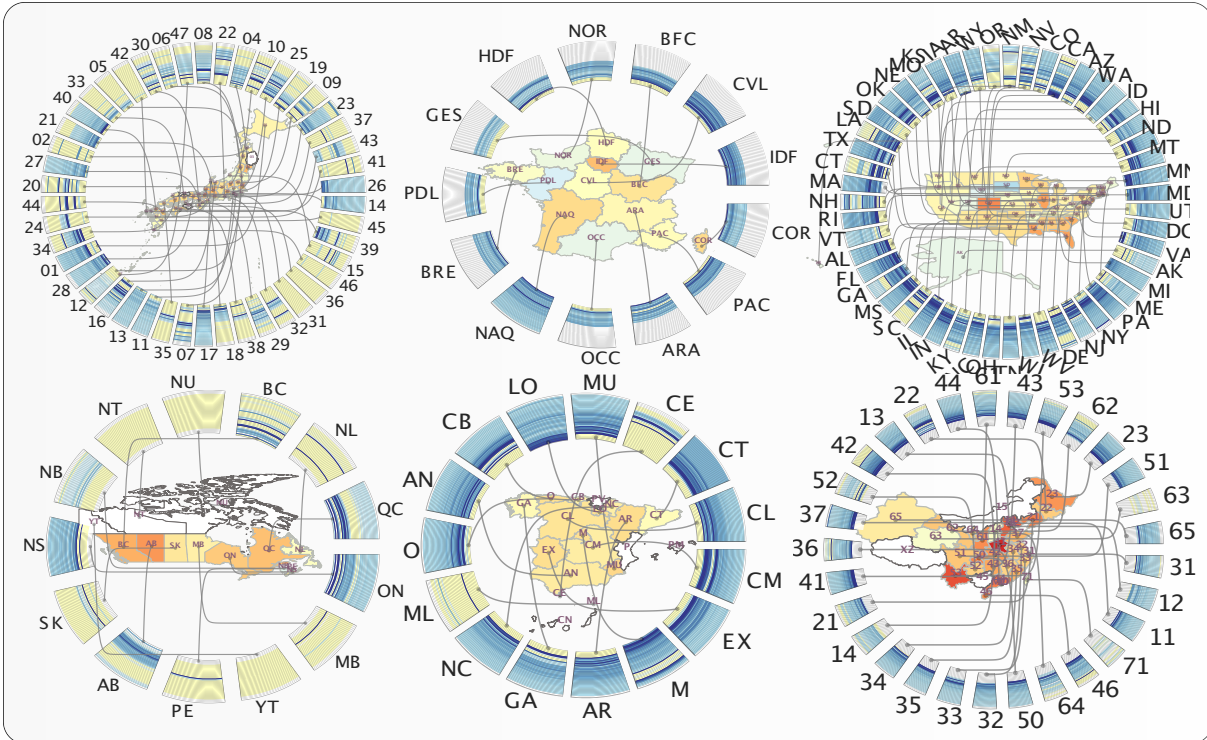

Figure S3: **Time evolution of effective reproduction number ( $R_t$ ) and absolute impact of travel restrictions on  $R_t$  in six countries.** Each subplot presents time evolution of  $R_t$  and impact of interventions on  $R_t$  for different top level administrative divisions of the country. The color of the regions (name in ISO 3166-2 code notation) represents the impact (increase or decrease of  $R_t$ ) of interventions on that state. The radial wedges represent the time evolution of  $R_t$  in the corresponding state, and color of the strips represent  $R_t$  on a particular day. The countries are, from top left to bottom right: Japan, France, USA, Canada, Spain and China.

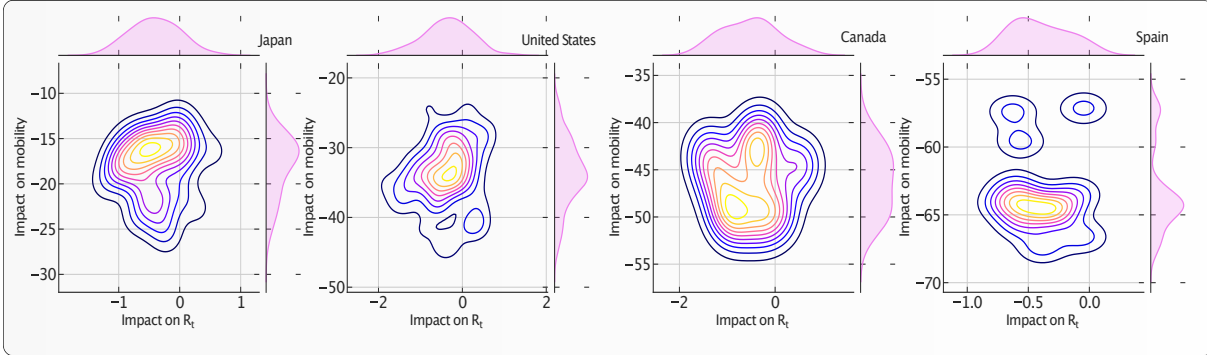

**Figure S4: Impact of travel restrictions on workplace activity and on epidemic progression ( $R_t$ ) in four countries.** Each panel represents the bivariate kernel density estimation as a function of the absolute impact on workplace activity and impact on  $R_t$  in the administrative divisions of each country. The bivariate distribution is constructed over the set of regions within each country. The top and right inset of each of the four plots represent the marginal distribution of the respective variables for each country. The countries are, from left to right: Japan, USA, Canada, and Spain.

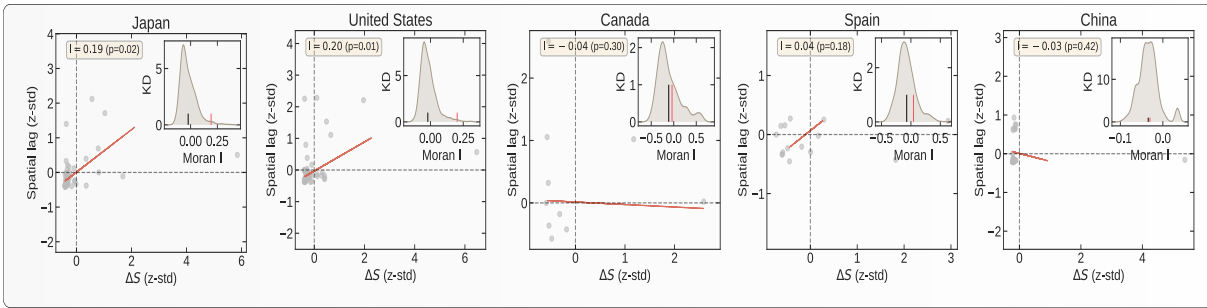

**Figure S5: Spatial auto-correlation of the total increase  $\Delta S$  in number of confirmed cases during the first 30 days of intervention in five countries.** In each panel, the x-axis corresponds to the value of  $\Delta S$  in a given region in a given country; the y-axis gives the average  $\Delta S$  over the neighboring regions, called “spatial lag” in the caption along the y-axis. These two variables are *z-standardised* for better comparison. The inset in each panel represents the Kernel Density estimator for the distribution of the simulated *Moran’s I*. The black vertical line in the inset represents the expected *Moran’s I* from simulations with the null hypothesis of no spatial correlations. The red vertical line represents the value obtained from empirical data. *Moran’s I* along with its p-value is given in yellow box. The countries are, from left to right: Japan, USA, Canada, Spain and China.

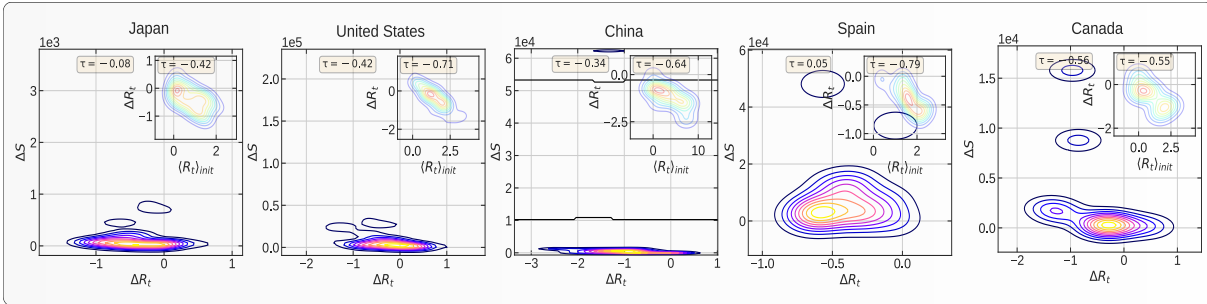

Figure S6: **Joint distribution of the total number  $\Delta S$  of confirmed cases within the first 30 days of intervention and of the absolute impact of intervention on the effective reproduction number ( $\Delta R_t$ ) within this period.** Each panel represents the Kernel Density Estimation for the total number of confirmed cases within the first 30 days of the intervention against the impact of interventions on effective reproduction number ( $\Delta R_t$ ) in different administrative divisions of a country. The bivariate distribution is constructed over the set of regions within each country. The yellow box contains the Kendall  $\tau$  correlation value for this joint distribution. The inset in each panel represents the variation of  $\Delta R_t$  during the intervention against the average initial  $R_t$  before the intervention. The yellow box gives the corresponding Kendalls  $\tau$ 's. The countries are, from top left to bottom right: Japan, USA, China, Spain, and Canada.

## 7 Supporting Tables

### 7.1 Impact of interventions on effective reproduction number and growth of epidemic

| Country | Administrative Division | p-value     | $\Delta R_t$ | $\Delta S$ |
|---------|-------------------------|-------------|--------------|------------|
| Canada  | Alberta                 | 0           | -1.39626     | 2061.0     |
| Canada  | British Columbia        | 0.027972    | -1.16284     | 1375.0     |
| Canada  | <b>New Brunswick</b>    | 0.000999001 | 0.491501     | 115.0      |
| Canada  | Ontario                 | 0.011988    | -0.855158    | 8772.0     |
| Canada  | Quebec                  | 0.024975    | -0.967118    | 15783.0    |
| Canada  | Saskatchewan            | 0.0589411   | -0.4651      | 303.0      |

Table S1: Impact of intervention on  $R_t$  and the total growth of confirmed cases in Canada. Administrative divisions with significant (confidence: 0.05) impact values are presented (the regions with positive contagion in bold face).

| Country | Administrative Division       | p-value     | $\Delta R_t$ | $\Delta S$ |
|---------|-------------------------------|-------------|--------------|------------|
| China   | Anhui Province                | 0.03996     | -0.802842    | 979.0      |
| China   | Beijing                       | 0.032967    | -1.26934     | 382.0      |
| China   | Chongqing City                | 0.021978    | -1.56294     | 558.0      |
| China   | Fujian Province               | 0.000999001 | -1.10573     | 283.0      |
| China   | Gansu Province                | 0.004995    | -0.904039    | 89.0       |
| China   | Guangdong Province            | 0           | -1.67239     | 1301.0     |
| China   | Jiangxi Province              | 0.00599401  | -0.729367    | 241.0      |
| China   | Hainan Province               | 0.011988    | -1.50345     | 163.0      |
| China   | Hebei Province                | 0.021978    | -1.91644     | 306.0      |
| China   | Heilongjiang Province         | 0.00699301  | -1.41766     | 478.0      |
| China   | Henan Province                | 0.013986    | -2.48088     | 1262.0     |
| China   | Hubei Province                | 0           | -1.33345     | 62218.0    |
| China   | Hunan Province                | 0           | -1.24172     | 1002.0     |
| China   | Jiangsu Province              | 0           | -0.782538    | 622.0      |
| China   | Jiangxi Province              | 0.001998    | -2.23217     | 931.0      |
| China   | Liaoning Province             | 0.046953    | -1.58059     | 118.0      |
| China   | Ningxia Hui Autonomous Region | 0.002997    | -0.84003     | 70.0       |
| China   | Shaanxi Province              | 0.028971    | -1.48649     | 242.0      |
| China   | Shandong Province             | 0           | -1.04356     | 743.0      |
| China   | Shanghai                      | 0.02997     | -0.619683    | 318.0      |
| China   | Sichuan Province              | 0           | -0.906403    | 517.0      |
| China   | Yunnan Province               | 0.000999001 | -2.06287     | 172.0      |
| China   | Zhejiang Province             | 0.002997    | -0.787457    | 1176.0     |

Table S2: Impact of intervention on  $R_t$  and the total growth of confirmed cases in China. Administrative divisions with significant (confidence: 0.05) impact values are presented (the regions with positive contagion in bold face).

| Country | Administrative Division | p-value  | $\Delta R_t$ | $\Delta S$ |
|---------|-------------------------|----------|--------------|------------|
| France  | Nouvelle-Aquitaine      | 0.002997 | -0.648405    | 3298.0     |

Table S3: Impact of intervention on  $R_t$  and the total growth of confirmed cases in France. Administrative divisions with significant (confidence: 0.05) impact values are presented (the regions with positive contagion in bold face).



| Country | Administrative Division | p-value     | $\Delta R_t$ | $\Delta S$ |
|---------|-------------------------|-------------|--------------|------------|
| Germany | <b>Bremen</b>           | 0           | 1.71413      | 457.0      |
| Germany | Hamburg                 | 0.000999001 | -0.942453    | 3633.0     |
| Germany | Hessen                  | 0.038961    | -0.86765     | 6053.0     |
| Germany | Niedersachsen           | 0.003996    | -0.847555    | 8027.0     |
| Germany | <b>Saarland</b>         | 0           | 0.862704     | 2090.0     |
| Germany | Sachsen                 | 0.045954    | -1.10722     | 3683.0     |

Table S4: Impact of intervention on  $R_t$  and the total growth of confirmed cases in Germany. Administrative divisions with significant (confidence: 0.05) impact values are presented (the regions with positive contagion in bold face).

| Country | Administrative Division | p-value  | $\Delta R_t$ | $\Delta S$ |
|---------|-------------------------|----------|--------------|------------|
| India   | <b>Maharashtra</b>      | 0.002997 | 0.650857     | 6305.0     |
| India   | <b>Odisha</b>           | 0        | 0.494264     | 87.0       |

Table S5: Impact of intervention on  $R_t$  and the total growth of confirmed cases in India. Administrative divisions with significant (confidence: 0.05) impact values are presented (the regions with positive contagion in bold face).

| Country | Administrative Division | p-value  | $\Delta R_t$ | $\Delta S$ |
|---------|-------------------------|----------|--------------|------------|
| Italy   | Puglia                  | 0.026973 | -0.778201    | 2464.0     |
| Italy   | Emilia-Romagna          | 0        | -0.381702    | 16439.0    |
| Italy   | Liguria                 | 0.037962 | -0.734625    | 4648.0     |
| Italy   | Marche                  | 0        | -1.00811     | 4387.0     |

Table S6: Impact of intervention on  $R_t$  and the total growth of confirmed cases in Italy. Administrative divisions with significant (confidence: 0.05) impact values are presented (the regions with positive contagion in bold face).

| Country | Administrative Division | p-value     | $\Delta R_t$ | $\Delta S$ |
|---------|-------------------------|-------------|--------------|------------|
| Japan   | Aichi Ken               | 0.004995    | -0.553495    | 238.0      |
| Japan   | Akita Ken               | 0.03996     | -0.362313    | 5.0        |
| Japan   | <b>Chiba Ken</b>        | 0.002997    | 0.297088     | 572.0      |
| Japan   | Fukui Ken               | 0.000999001 | -0.988835    | 57.0       |
| Japan   | Fukuoka Ken             | 0.034965    | -0.573188    | 451.0      |
| Japan   | Gifu Ken                | 0           | -1.02953     | 81.0       |
| Japan   | Hyogo Ken               | 0.00799201  | -0.721471    | 447.0      |
| Japan   | Ibaraki Ken             | 0.048951    | -0.935754    | 90.0       |
| Japan   | Kochi Ken               | 0.017982    | -0.676786    | 36.0       |
| Japan   | Kyoto Fu                | 0.00799201  | -0.416234    | 196.0      |
| Japan   | Miyagi Ken              | 0           | -1.02827     | 56.0       |
| Japan   | Okayama Ken             | 0.00899101  | -0.567645    | 11.0       |
| Japan   | Osaka Fu                | 0.016983    | -0.359852    | 1217.0     |
| Japan   | <b>Saga Ken</b>         | 0           | 0.564563     | 34.0       |
| Japan   | Tochigi Ken             | 0.0579421   | -0.567938    | 34.0       |
| Japan   | Tokyo To                | 0.036963    | -0.201202    | 3611.0     |
| Japan   | Yamagata Ken            | 0.01998     | -0.612601    | 50.0       |
| Japan   | Yamaguchi Ken           | 0.037962    | -0.4729      | 21.0       |
| Japan   | Yamanashi Ken           | 0.00999001  | -0.855139    | 34.0       |

Table S7: Impact of intervention on  $R_t$  and the total growth of confirmed cases in Japan. Administrative divisions with significant (confidence: 0.05) impact values are presented (the regions with positive contagion in bold face).

| Country | Administrative Division | p-value     | $\Delta R_t$ | $\Delta S$ |
|---------|-------------------------|-------------|--------------|------------|
| Spain   | Asturias                | 0.048951    | -0.571728    | 1958.0     |
| Spain   | La Rioja                | 0.00899101  | -0.562582    | 3304.0     |
| Spain   | Madrid                  | 0.000999001 | -0.568361    | 48108.0    |

Table S8: Impact of intervention on  $R_t$  and the total growth of confirmed cases in Spain. Administrative divisions with significant (confidence: 0.05) impact values are presented (the regions with positive contagion in bold face).

| Country     | Administrative Division | p-value    | $\Delta R_t$ | $\Delta S$ |
|-------------|-------------------------|------------|--------------|------------|
| Switzerland | Appenzell Ausserrhoden  | 0.04995    | -2.53811     | 68.0       |
| Switzerland | Bern                    | 0.016983   | -1.3457      | 1347.0     |
| Switzerland | Fribourg                | 0          | -0.764614    | 834.0      |
| Switzerland | Genève                  | 0          | -0.749412    | 3902.0     |
| Switzerland | Graubünden              | 0.0599401  | -0.690593    | 625.0      |
| Switzerland | <b>Luzern</b>           | 0          | 0.384942     | 524.0      |
| Switzerland | Neuchâtel               | 0.001998   | -0.370057    | 506.0      |
| Switzerland | <b>Solothurn</b>        | 0          | 0.292663     | 282.0      |
| Switzerland | St. Gallen              | 0.0569431  | -2.59314     | 617.0      |
| Switzerland | Ticino                  | 0.00899101 | -1.08246     | 2544.0     |
| Switzerland | Valais                  | 0.001998   | -1.13367     | 1535.0     |
| Switzerland | Vaud                    | 0.00599401 | -1.08239     | 4125.0     |
| Switzerland | Zürich                  | 0          | -1.19565     | 2739.0     |

Table S9: Impact of intervention on  $R_t$  and the total growth of confirmed cases in Switzerland. Administrative divisions with significant (confidence: 0.05) impact values are presented (the regions with positive contagion in bold face).

| Country       | Administrative Division | p-value     | $\Delta R_t$ | $\Delta S$ |
|---------------|-------------------------|-------------|--------------|------------|
| United States | <b>Alaska</b>           | 0.0559441   | 0.44278      | 303.0      |
| United States | Colorado                | 0.00599401  | -1.53705     | 8459.0     |
| United States | Connecticut             | 0.004995    | -1.7927      | 16713.0    |
| United States | Florida                 | 0.004995    | -1.27691     | 23729.0    |
| United States | Georgia                 | 0           | -0.887848    | 16907.0    |
| United States | Louisiana               | 0.000999001 | -1.28319     | 22771.0    |
| United States | Maryland                | 0.002997    | -0.52522     | 11465.0    |
| United States | Massachusetts           | 0           | -0.700434    | 34896.0    |
| United States | Michigan                | 0           | -0.460859    | 26631.0    |
| United States | Minnesota               | 0           | -0.768463    | 1982.0     |
| United States | Mississippi             | 0.035964    | -0.80443     | 3743.0     |
| United States | New Jersey              | 0.040959    | -0.934117    | 77725.0    |
| United States | Pennsylvania            | 0.011988    | -0.584873    | 29256.0    |
| United States | South Carolina          | 0.03996     | -1.14461     | 3871.0     |
| United States | <b>South Dakota</b>     | 0           | 1.08317      | 1400.0     |
| United States | <b>Wyoming</b>          | 0.020979    | 0.536284     | 278.0      |

Table S10: Impact of intervention on  $R_t$  and the total growth of confirmed cases in United States. Administrative divisions with significant (confidence: 0.05) impact values are presented (the regions with positive contagion in bold face).

# 8 Supplemental figures

## 8.1 Mobility Impact

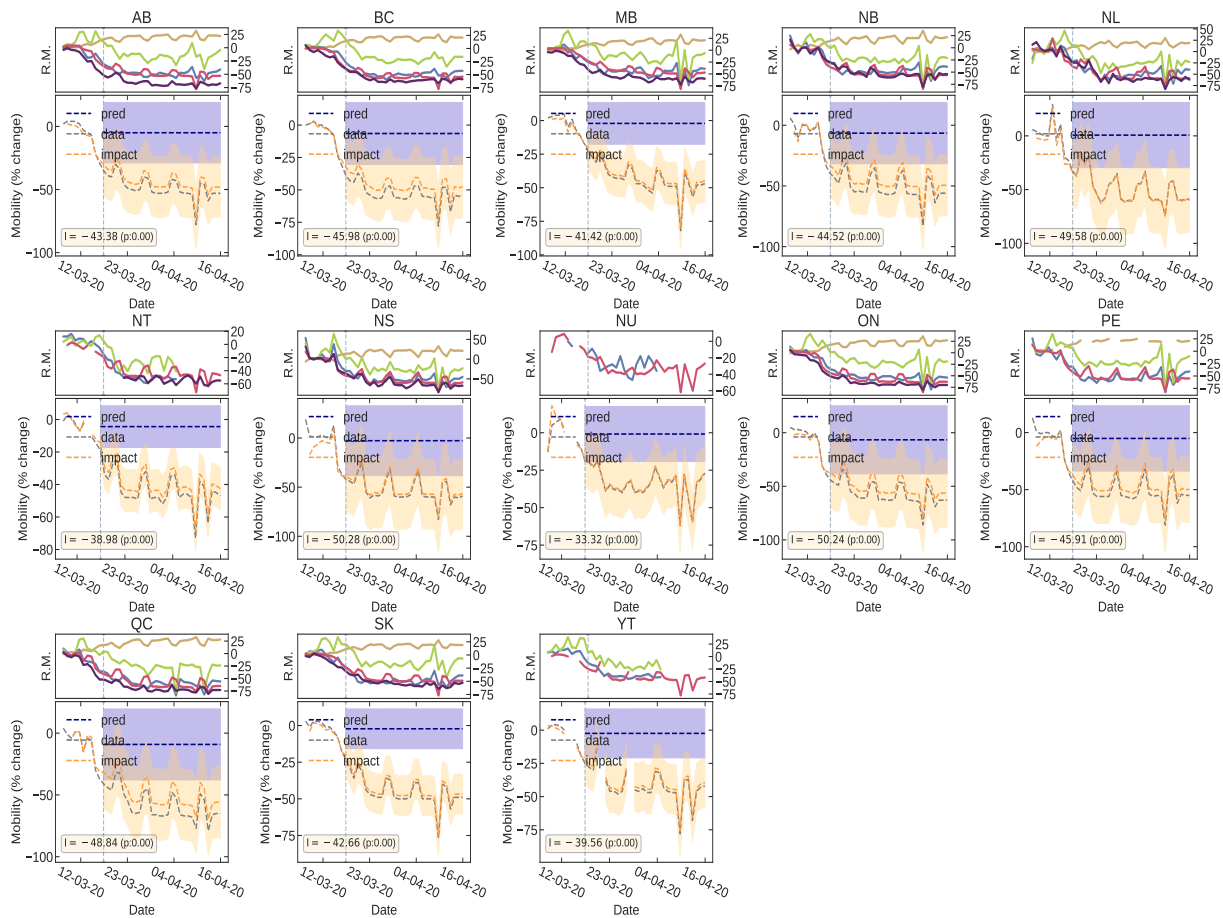

Figure S7: Impact of Governmental interventions on mobility in different administrative divisions of Canada.

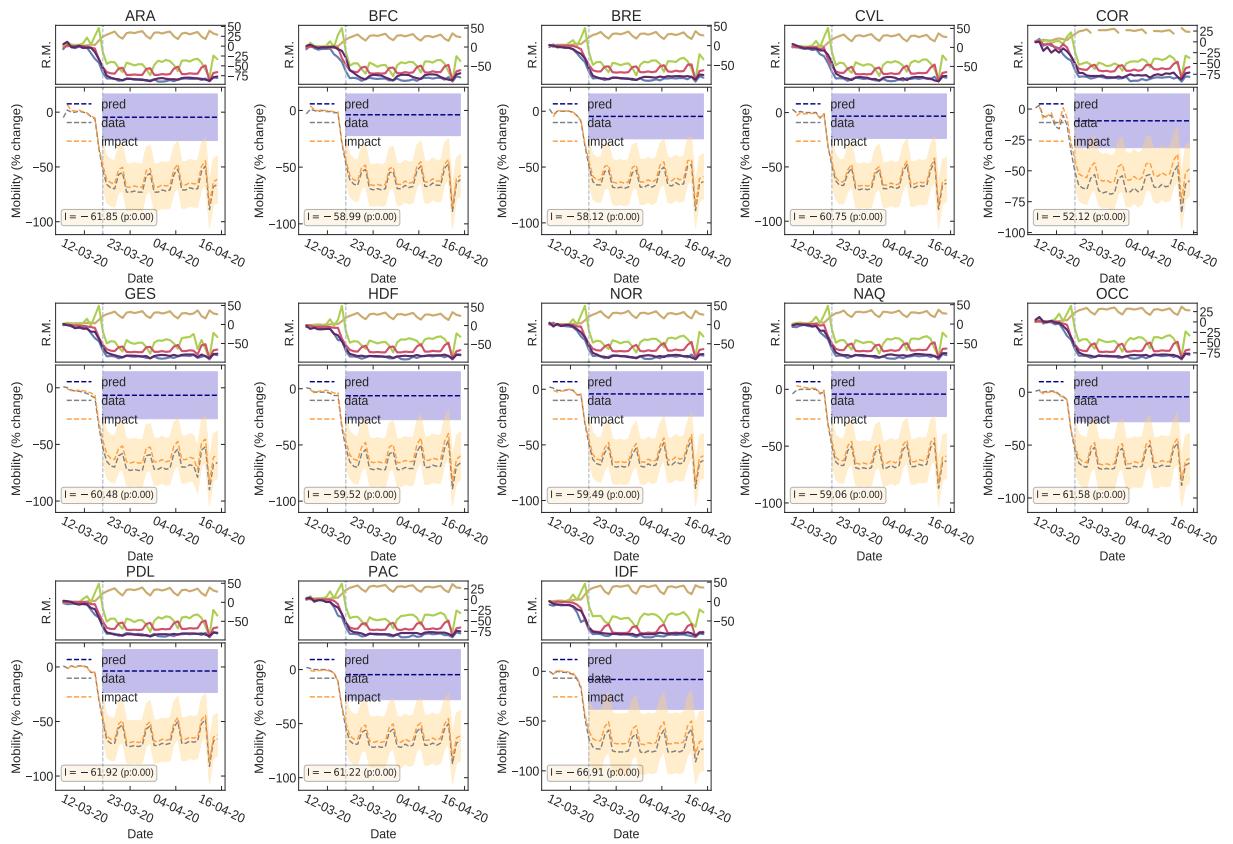

Figure S8: Impact of Governmental interventions on mobility in different administrative divisions of France.

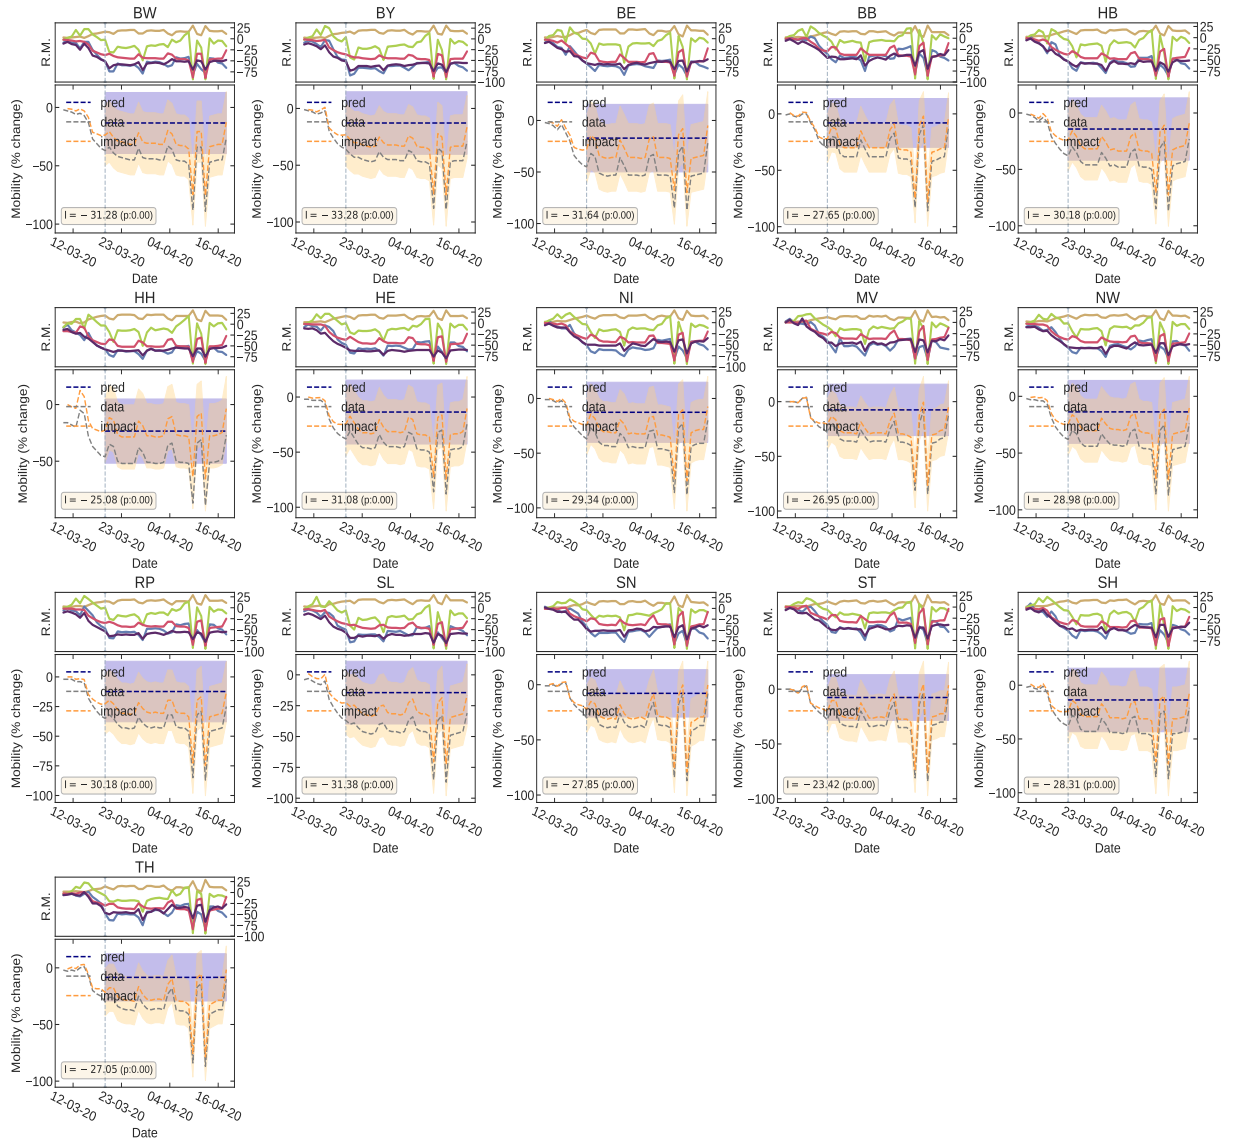

Figure S9: Impact of Governmental interventions on mobility in different administrative divisions of Germany.

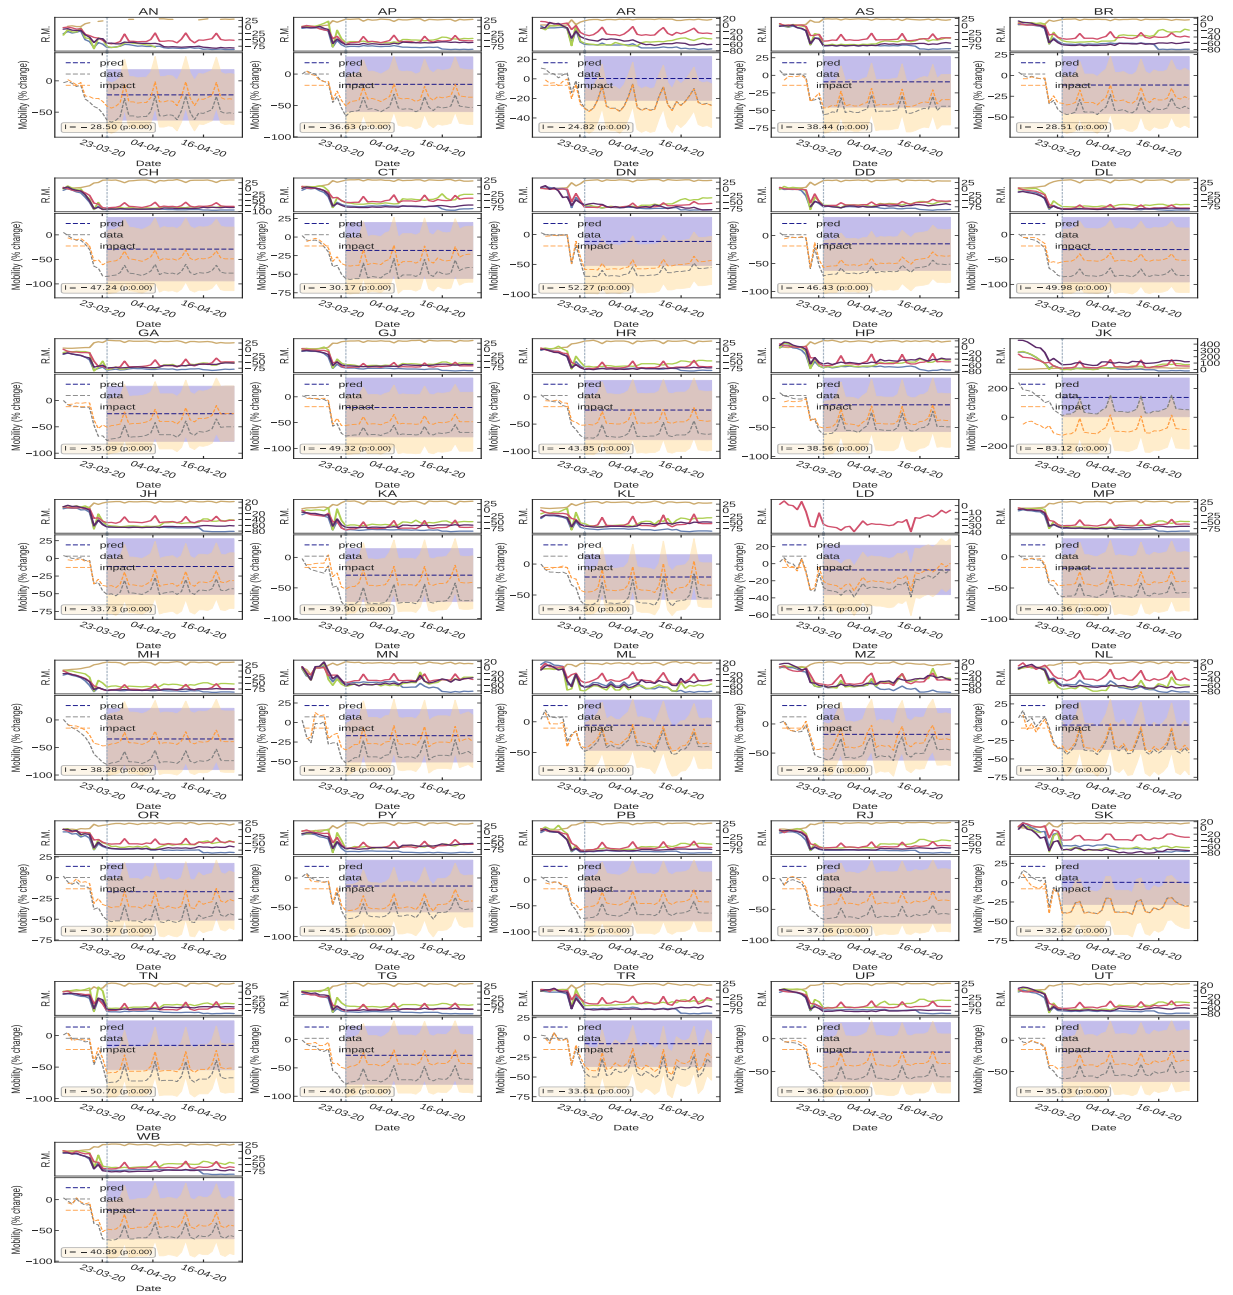

Figure S10: Impact of Governmental interventions on mobility in different administrative divisions of India.



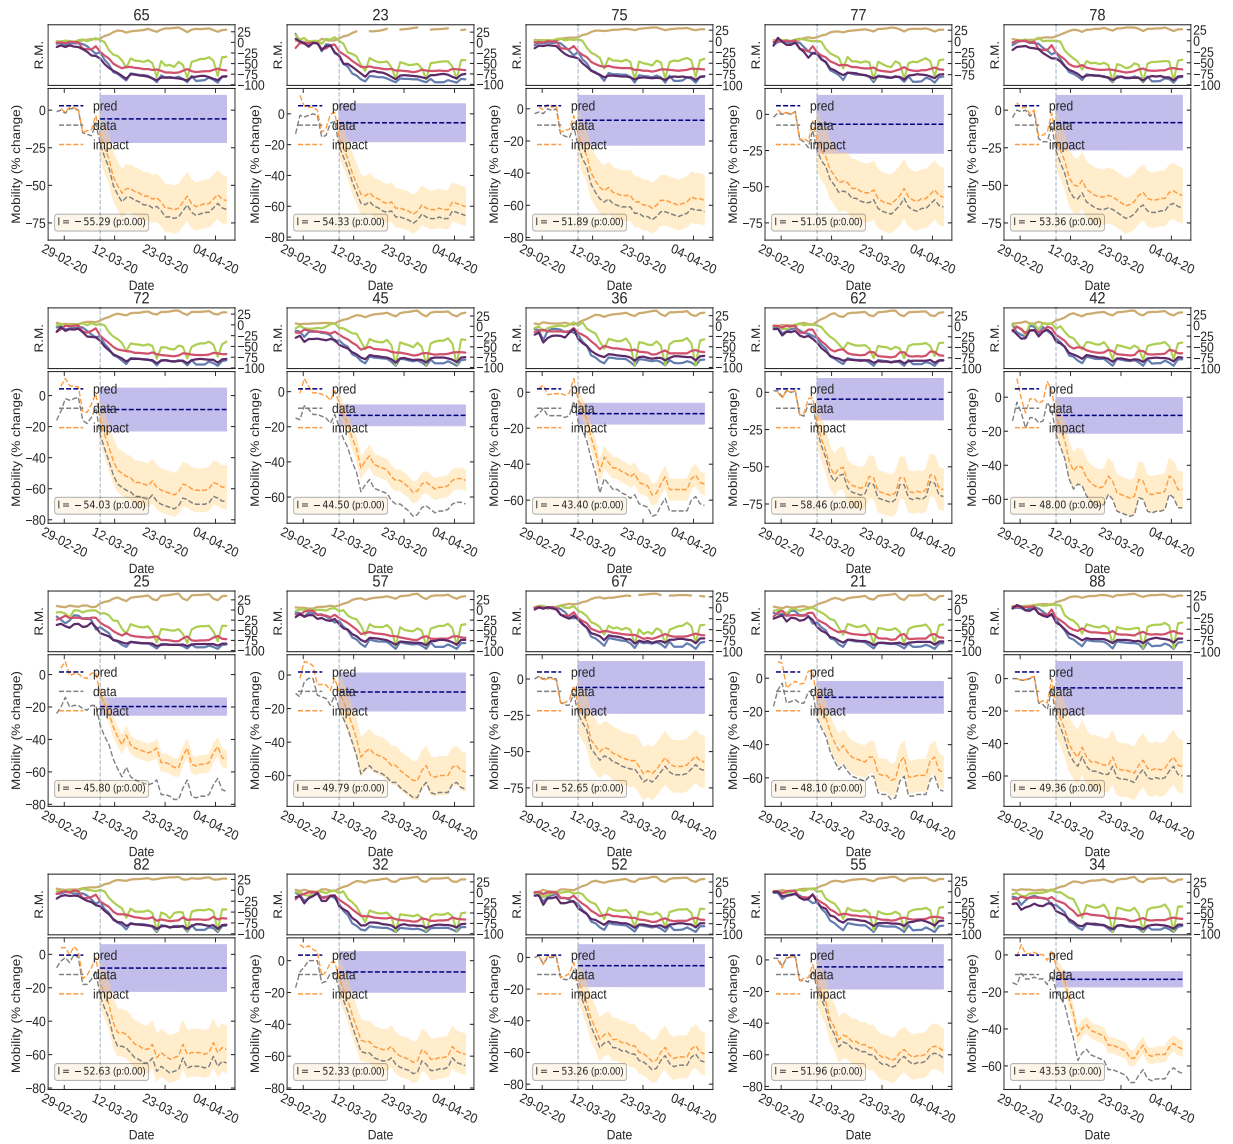

Figure S11: Impact of Governmental interventions on mobility in different administrative divisions of Italy.

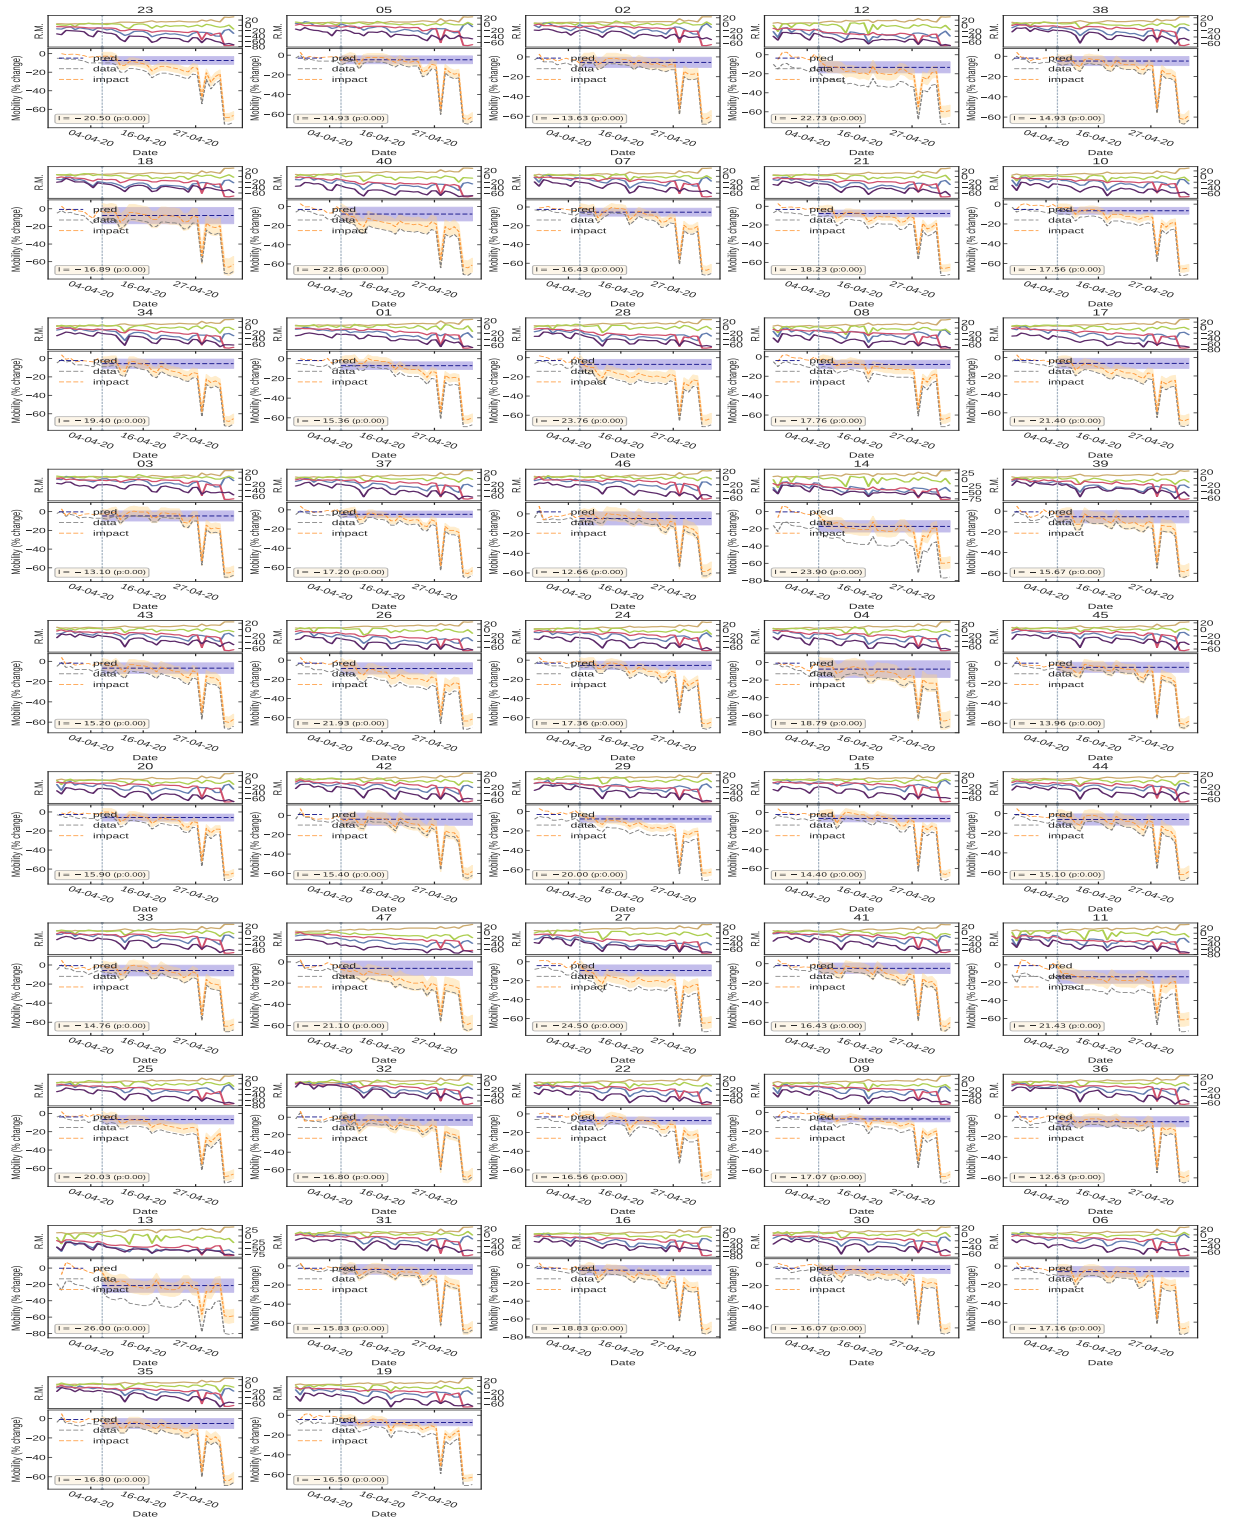

Figure S12: Impact of Governmental interventions on mobility in different administrative divisions of Japan.

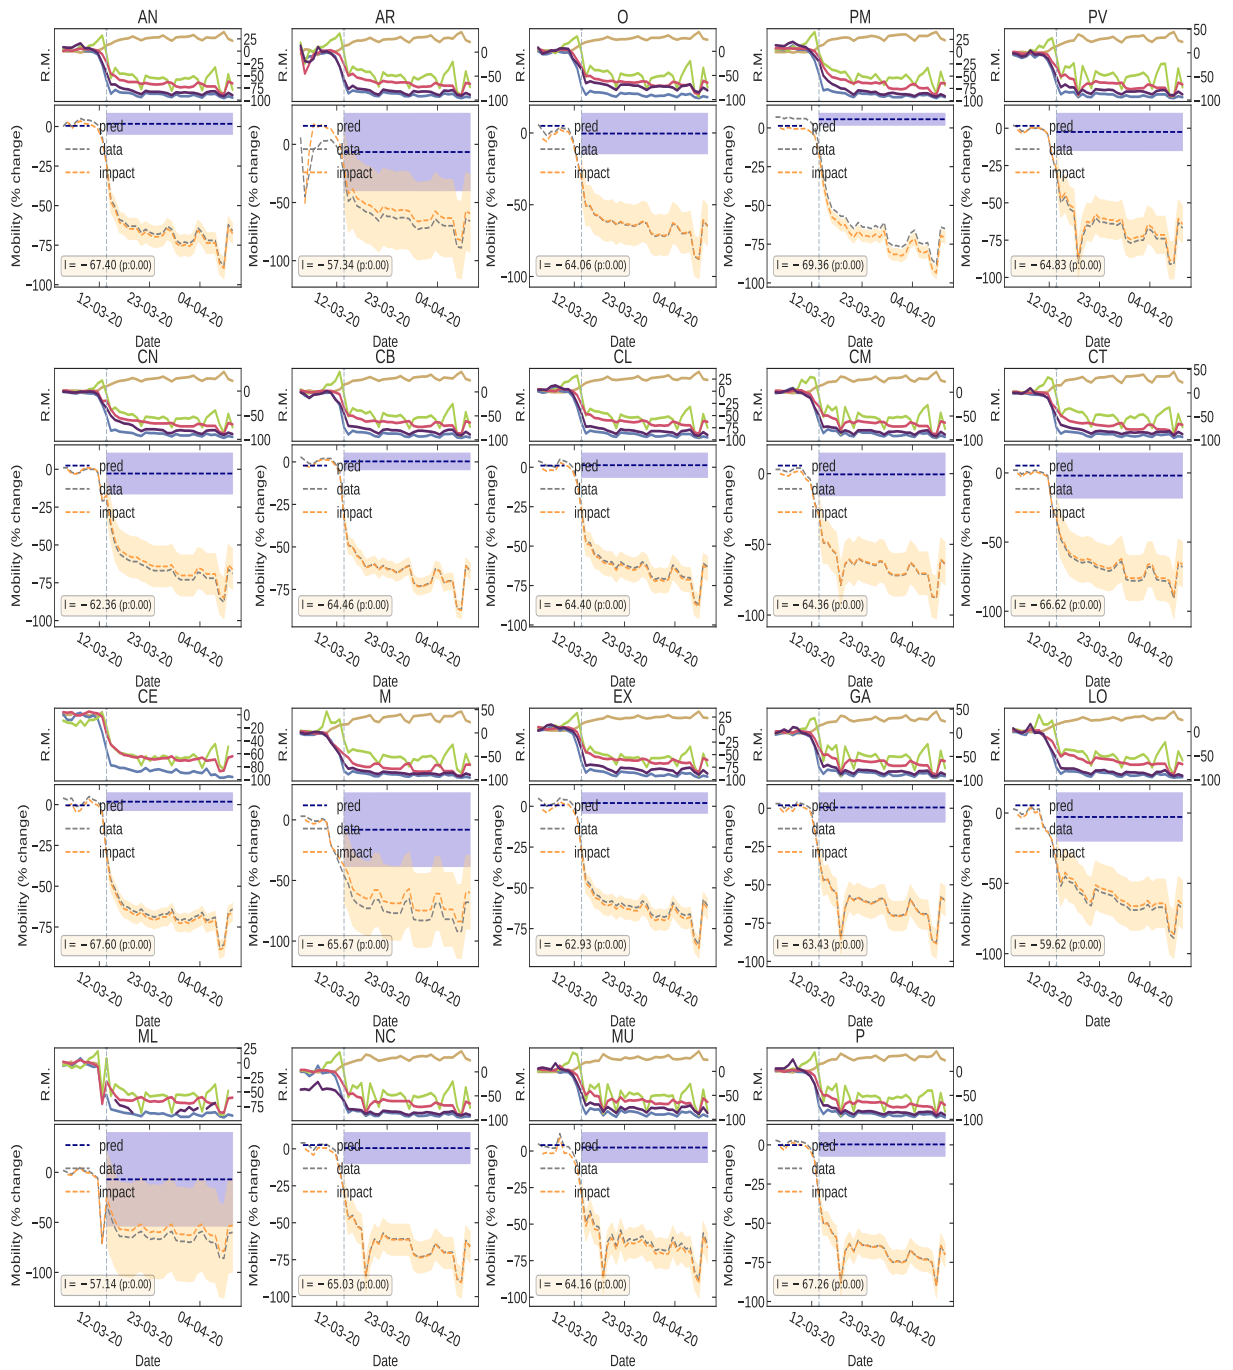

Figure S13: Impact of Governmental interventions on mobility in different administrative divisions of Spain.

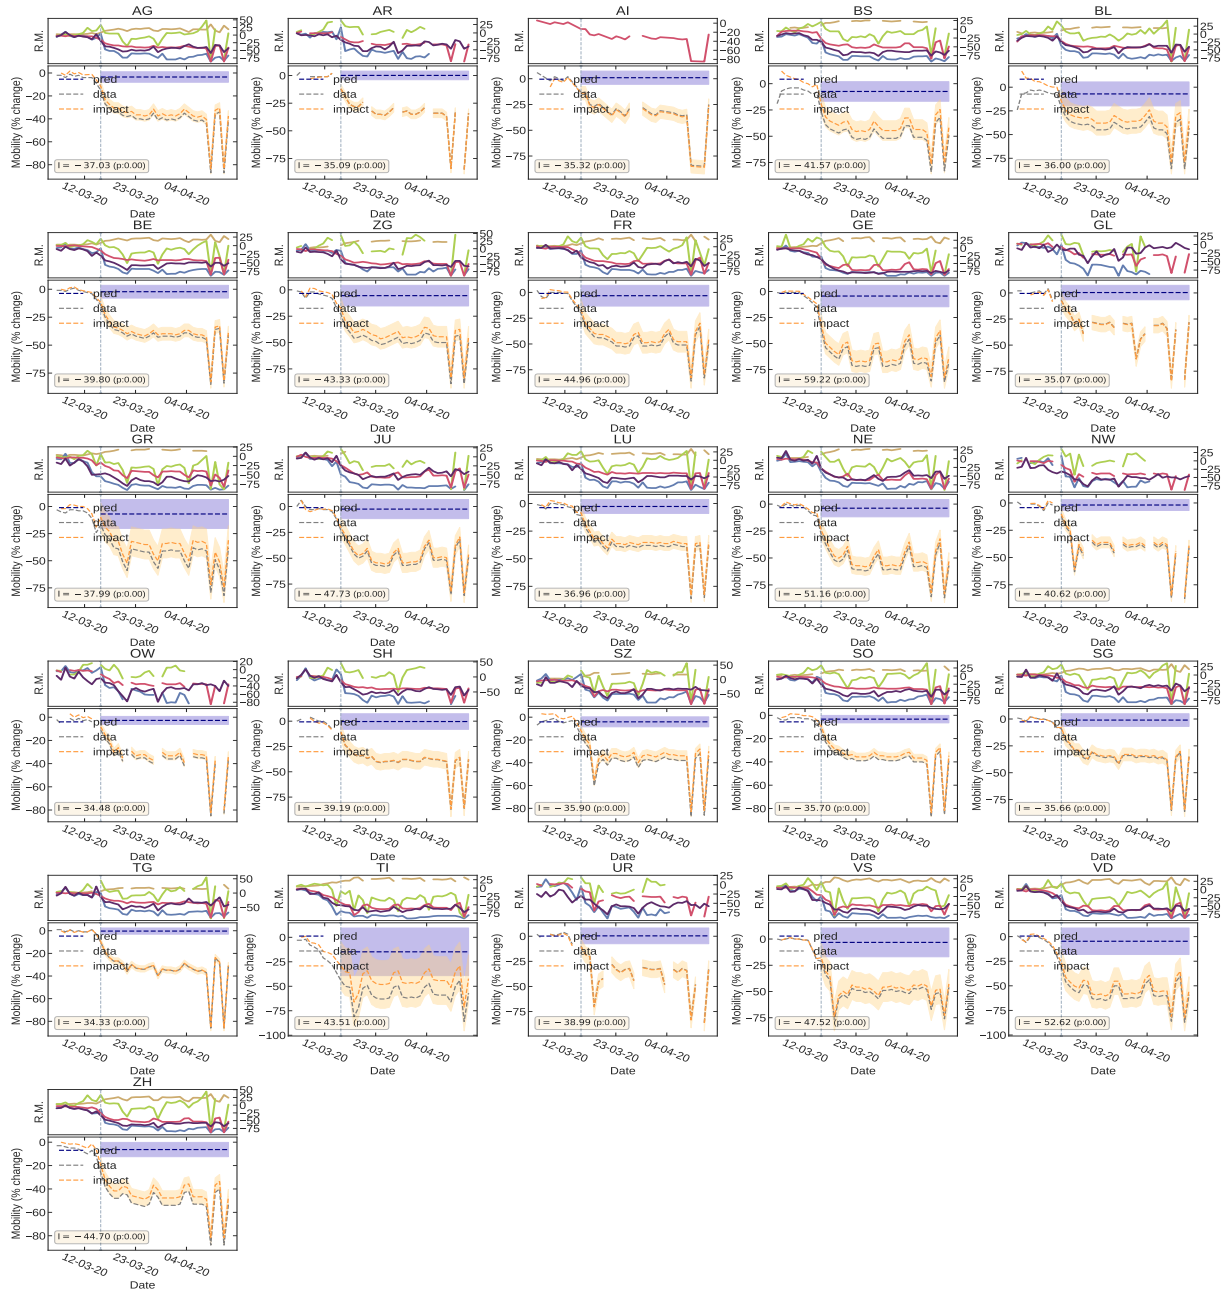

Figure S14: Impact of Governmental interventions on mobility in different administrative divisions of Switzerland.

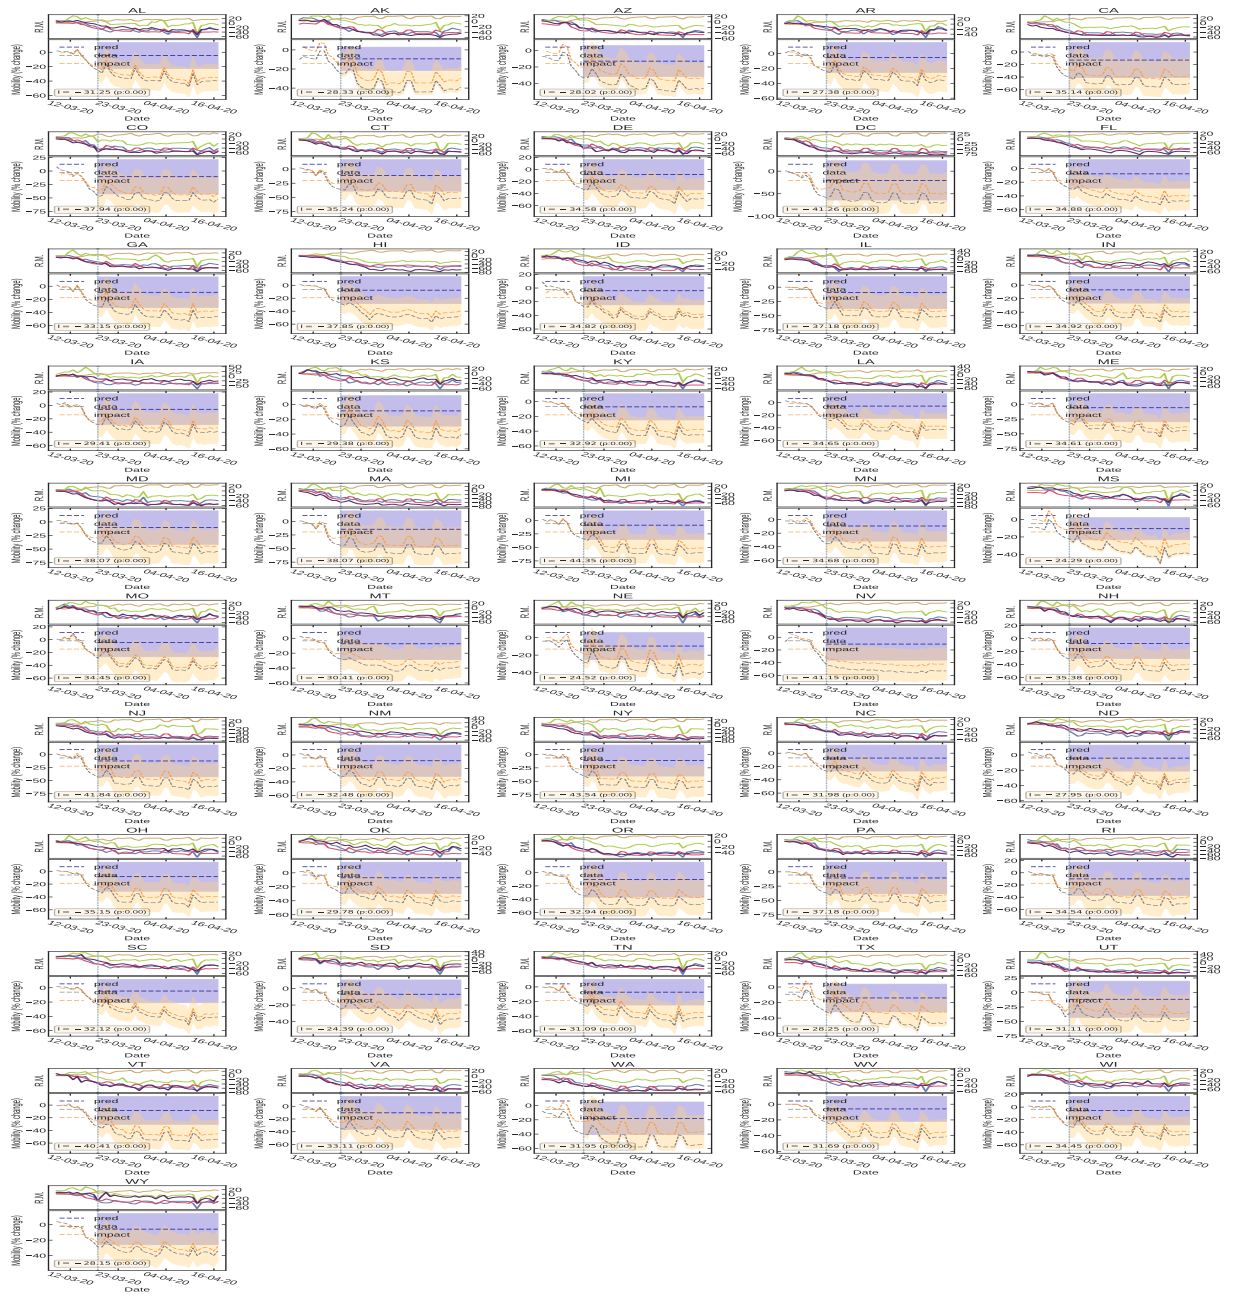

Figure S15: Impact of Governmental interventions on mobility in different administrative divisions of United States.

## 8.2 Epidemic Impact

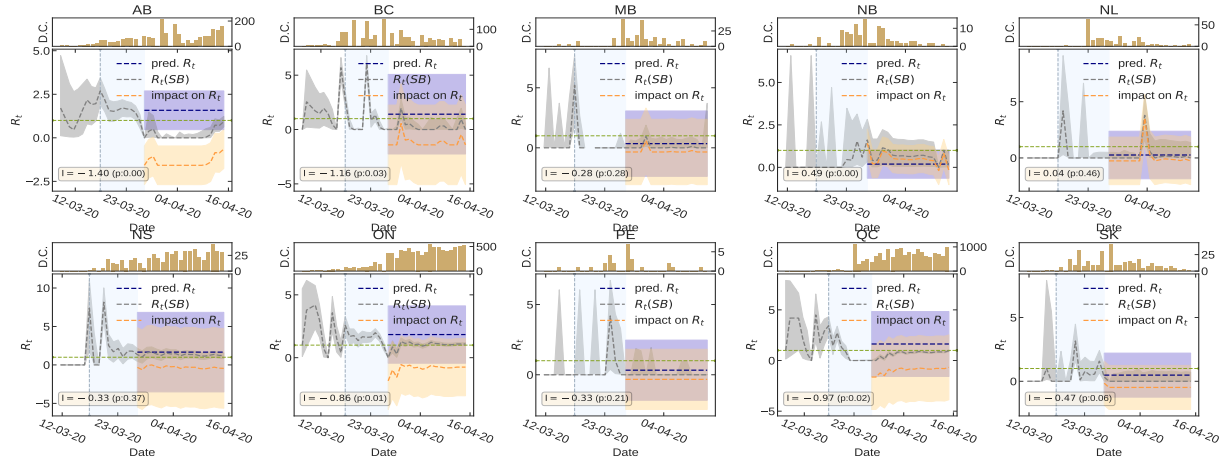

Figure S16: Impact of Governmental interventions on  $R_t$  in different administrative divisions of Canada.

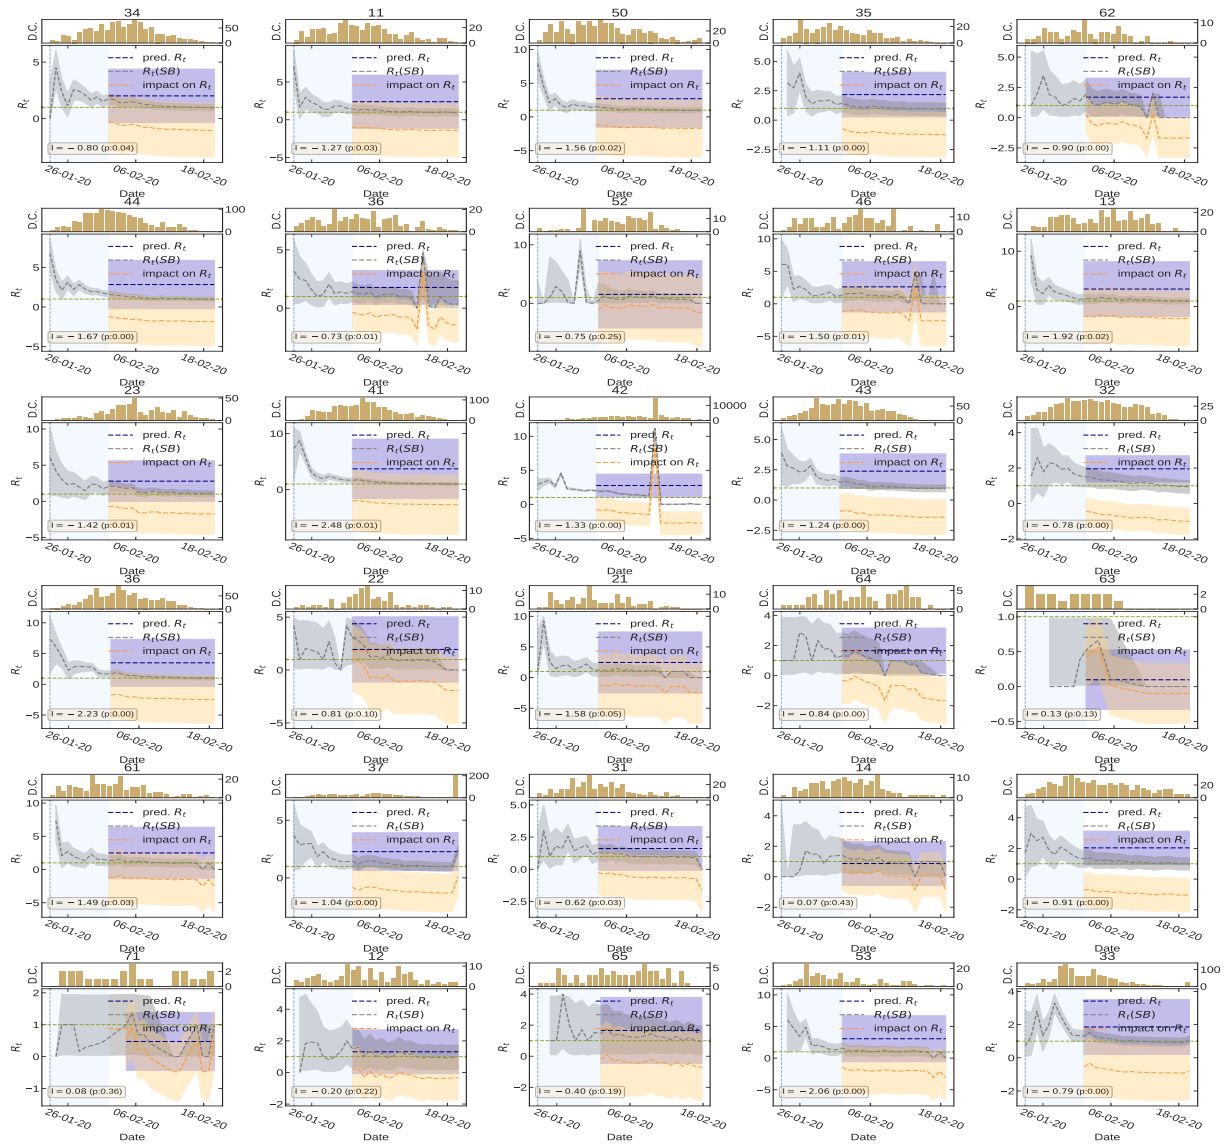

Figure S17: Impact of Governmental interventions on  $R_t$  in different administrative divisions of China.

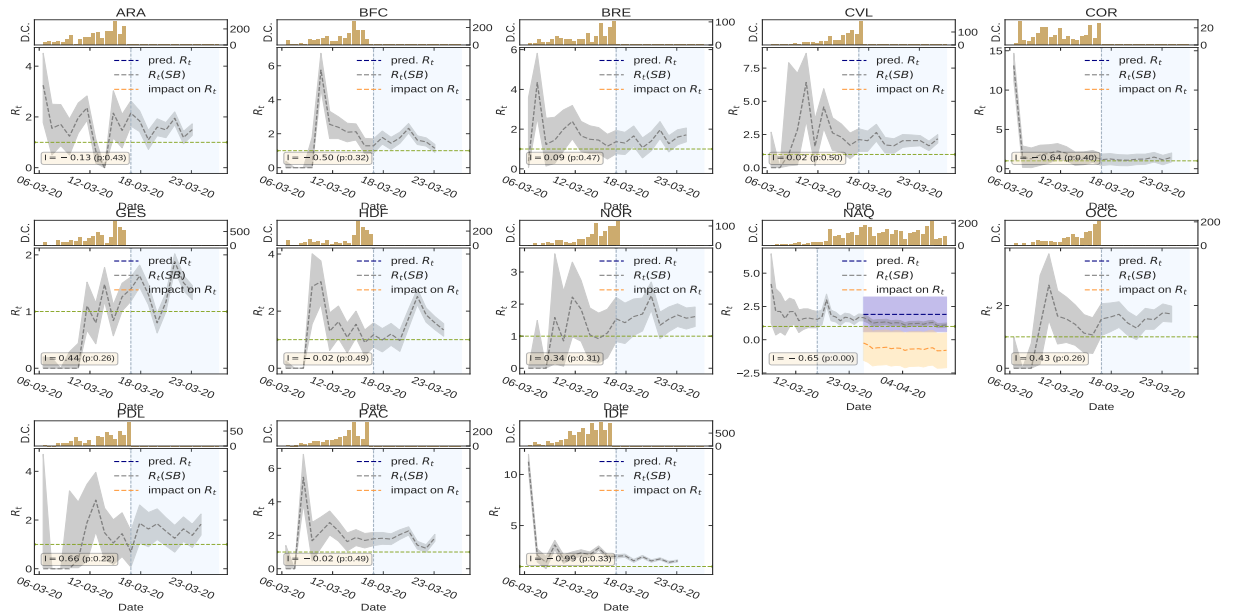

Figure S18: Impact of Governmental interventions on  $R_t$  in different administrative divisions of France.



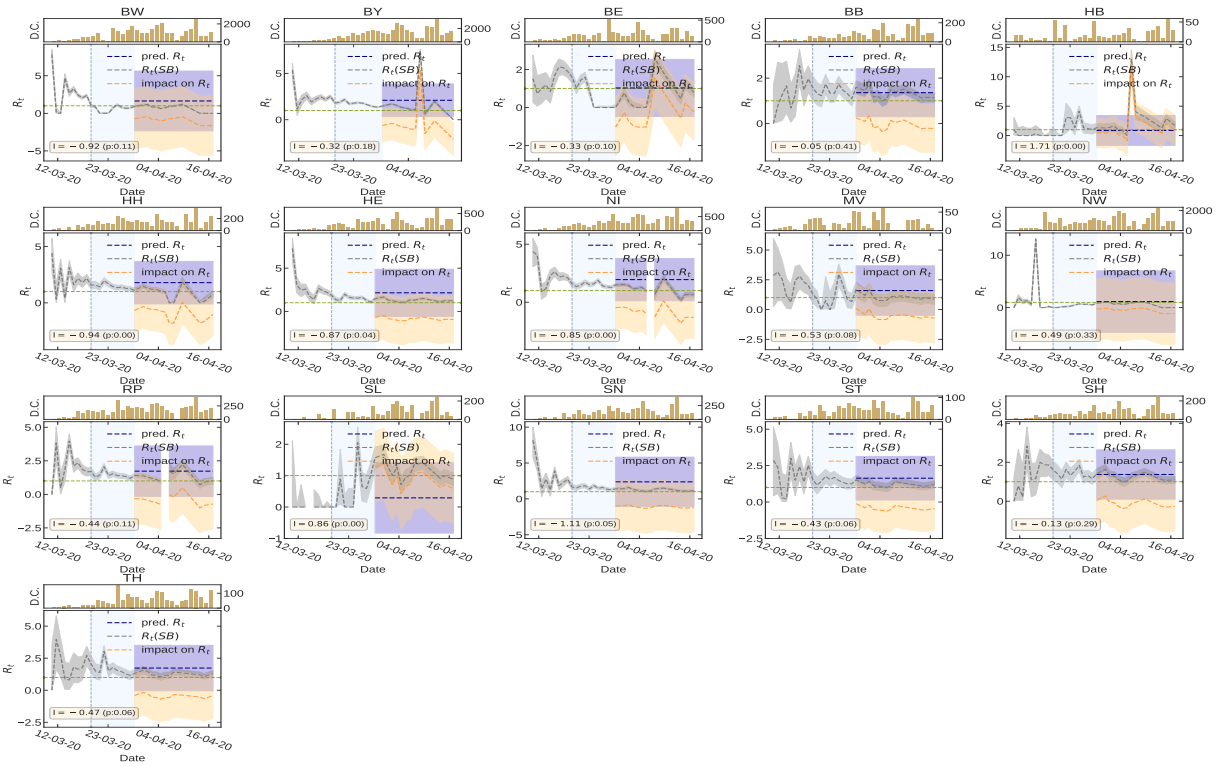

Figure S19: Impact of Governmental interventions on  $R_t$  in different administrative divisions of Germany.

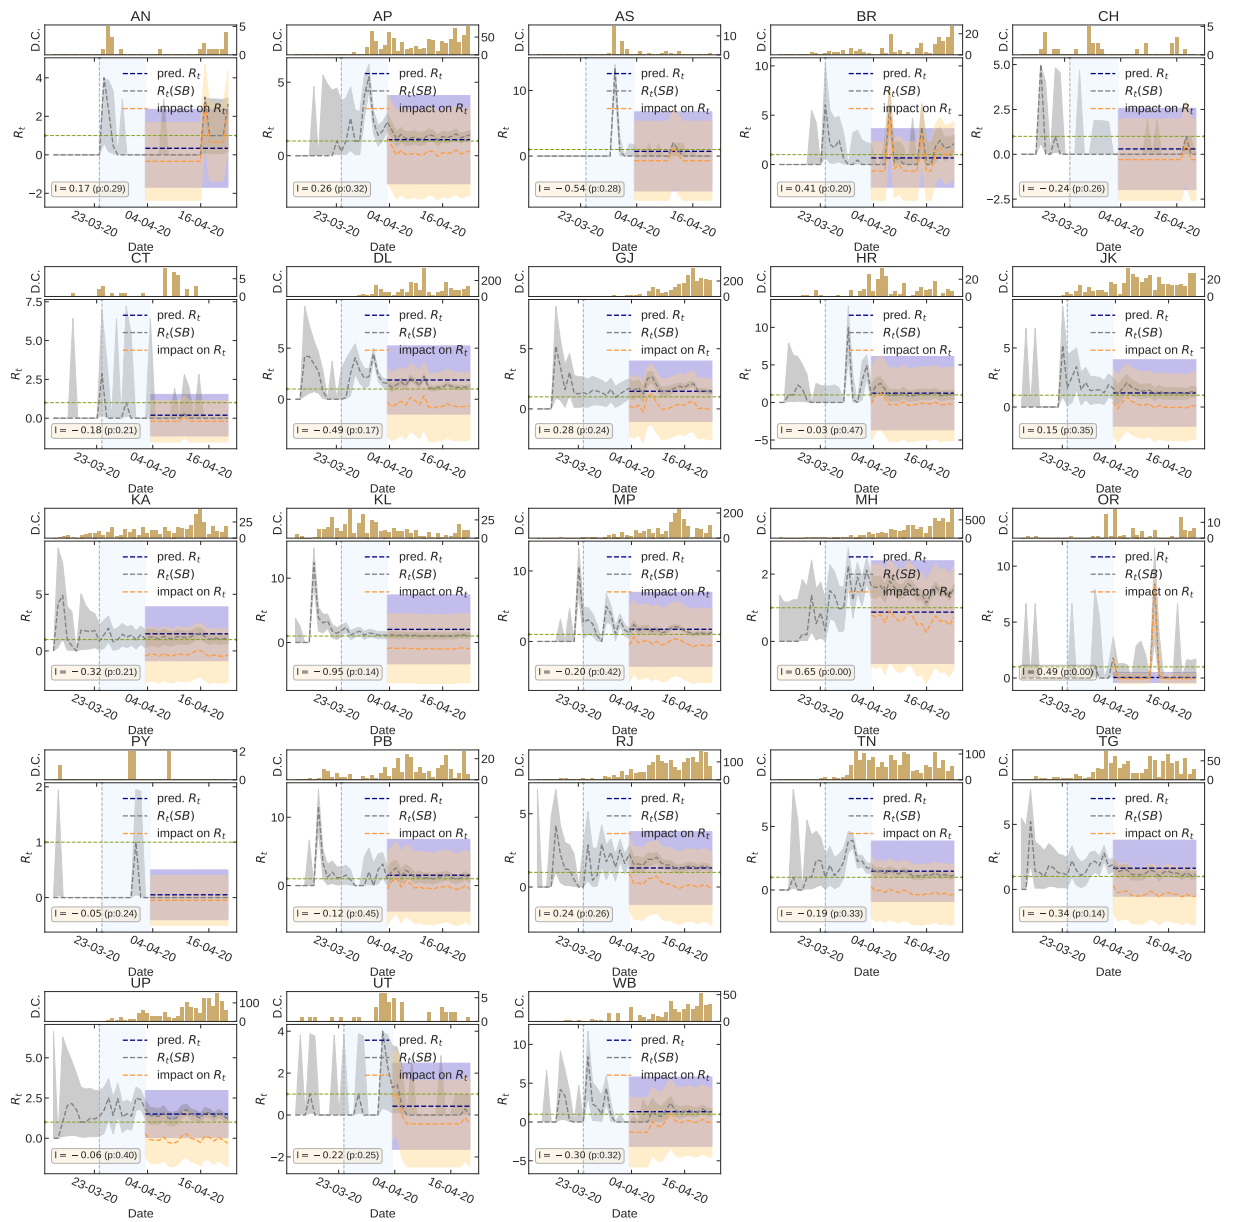

Figure S20: Impact of Governmental interventions on  $R_t$  in different administrative divisions of India.

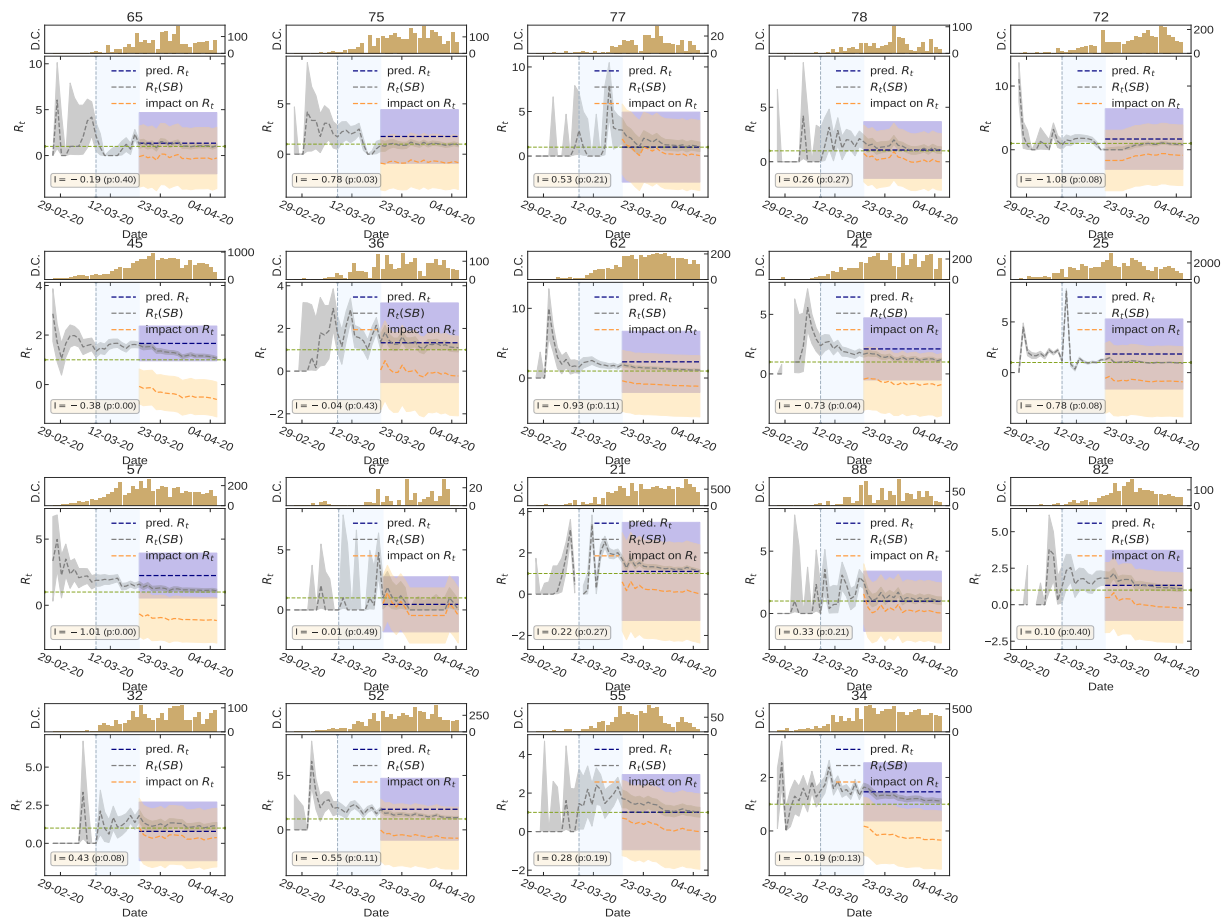

Figure S21: Impact of Governmental interventions on  $R_t$  in different administrative divisions of Italy.

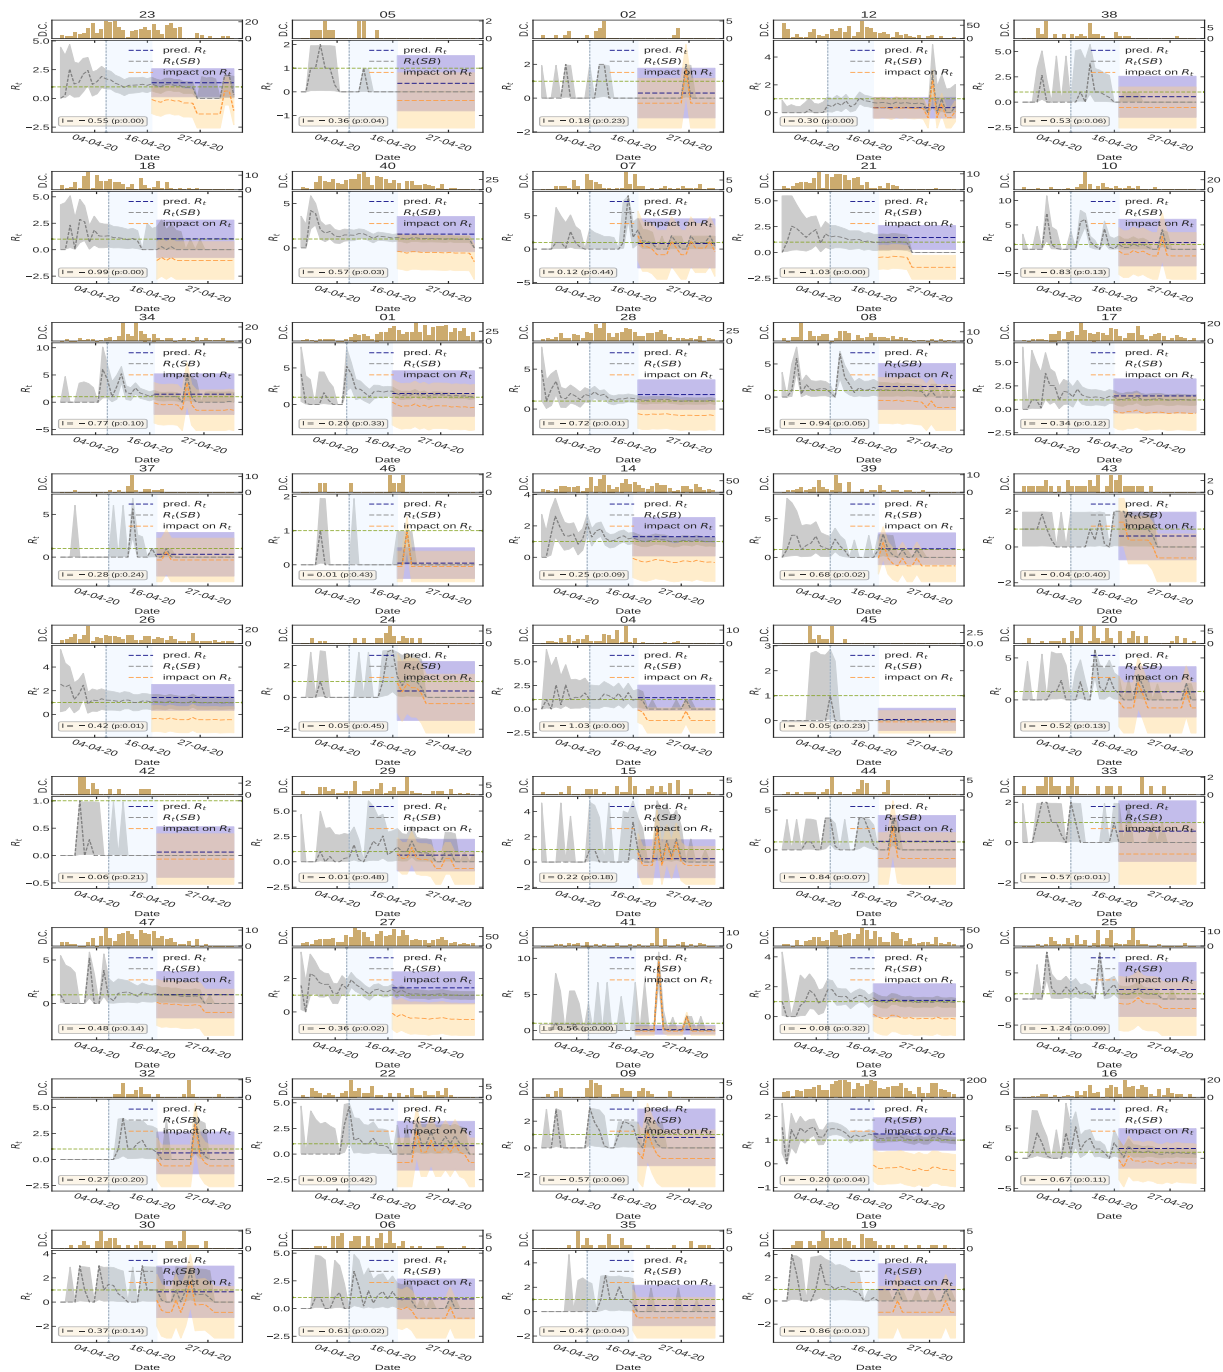

Figure S22: Impact of Governmental interventions on  $R_t$  in different administrative divisions of Japan.

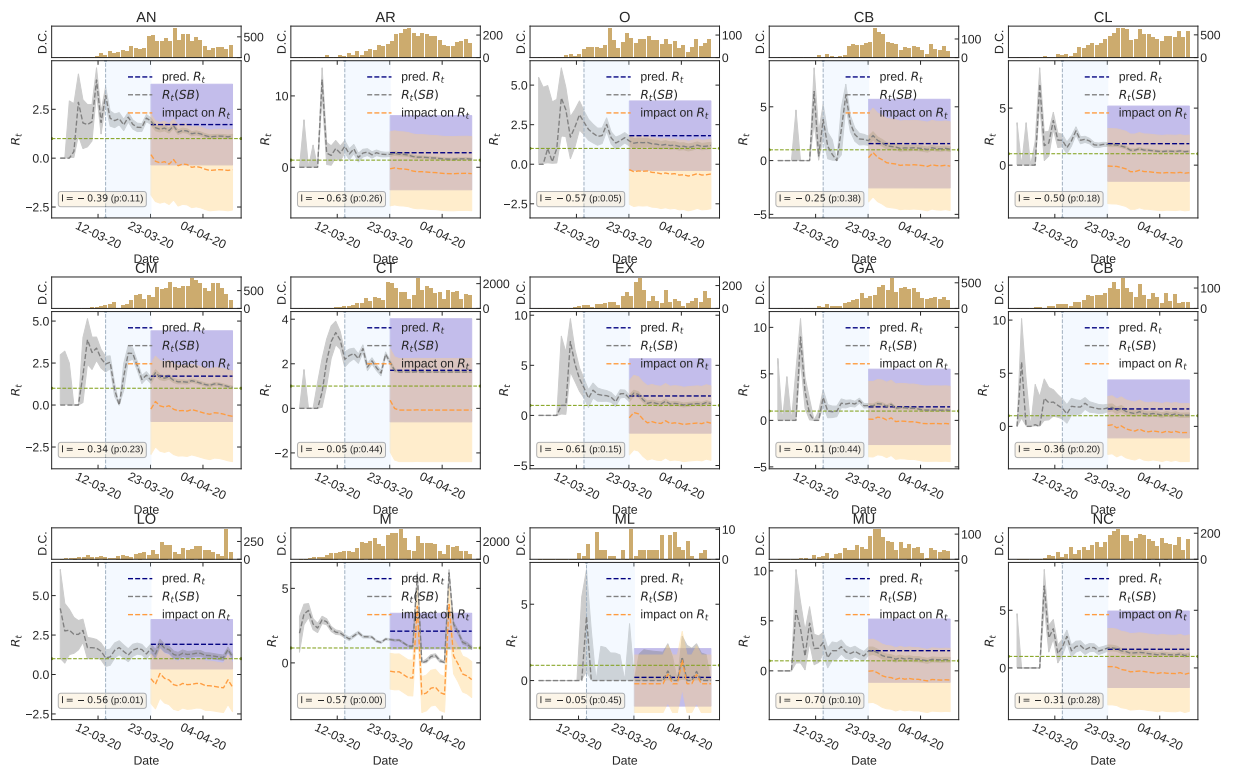

Figure S23: Impact of Governmental interventions on  $R_t$  in different administrative divisions of Spain.

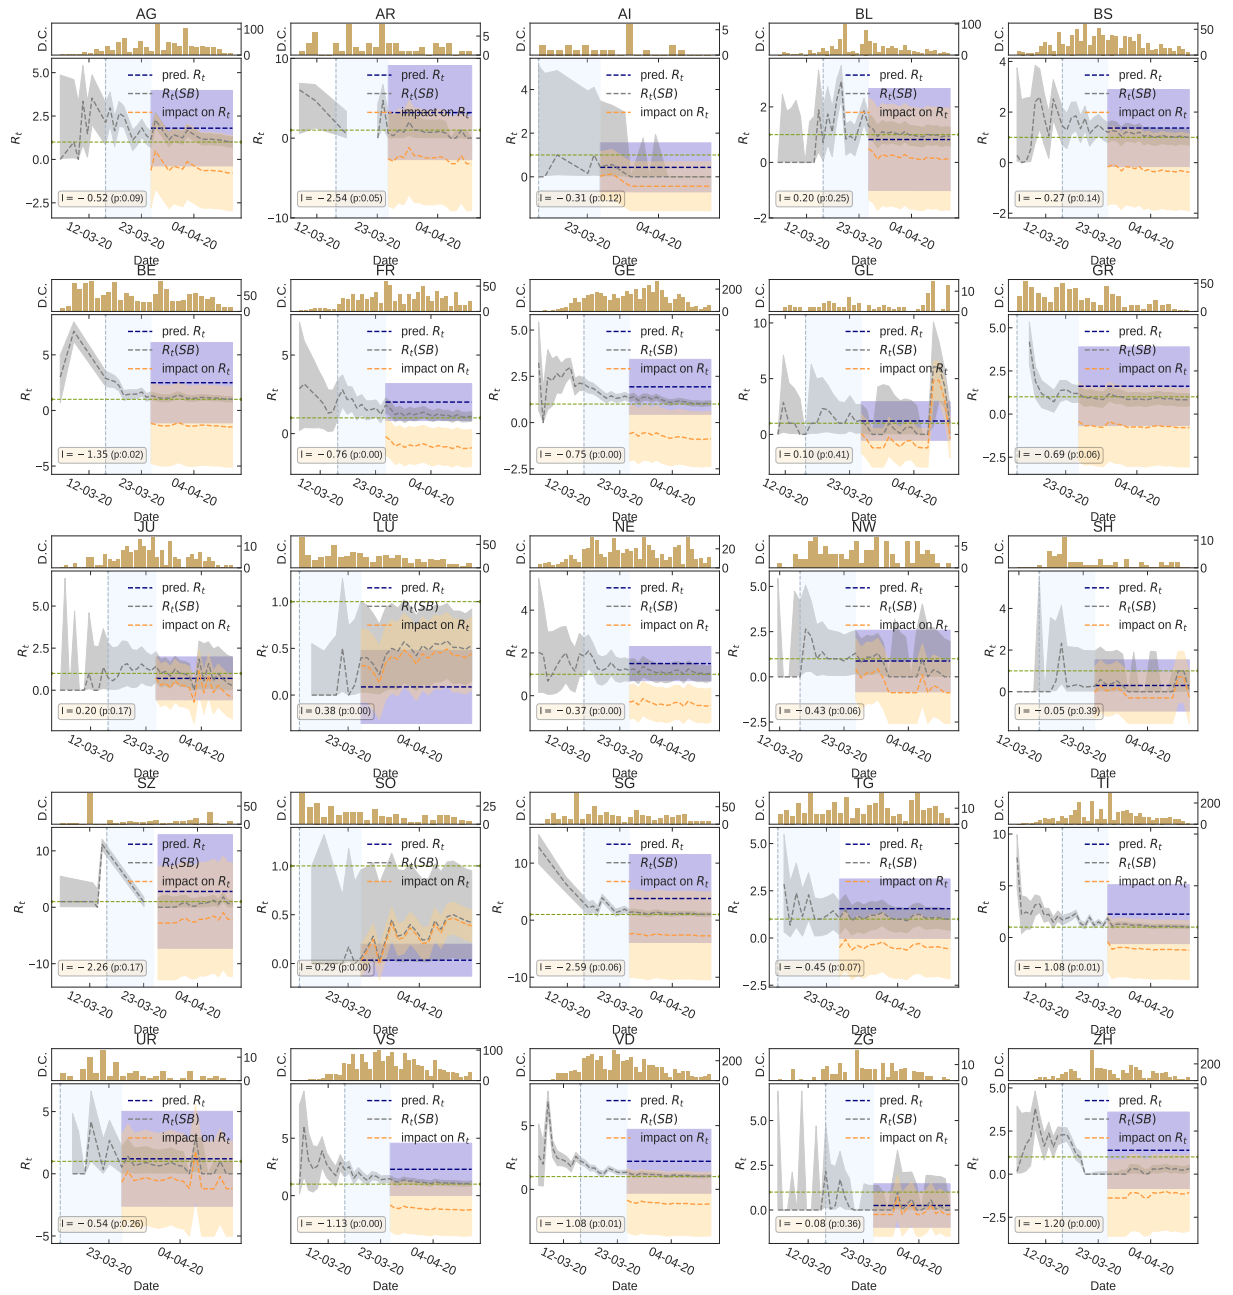

Figure S24: Impact of Governmental interventions on  $R_t$  in different administrative divisions of Switzerland.

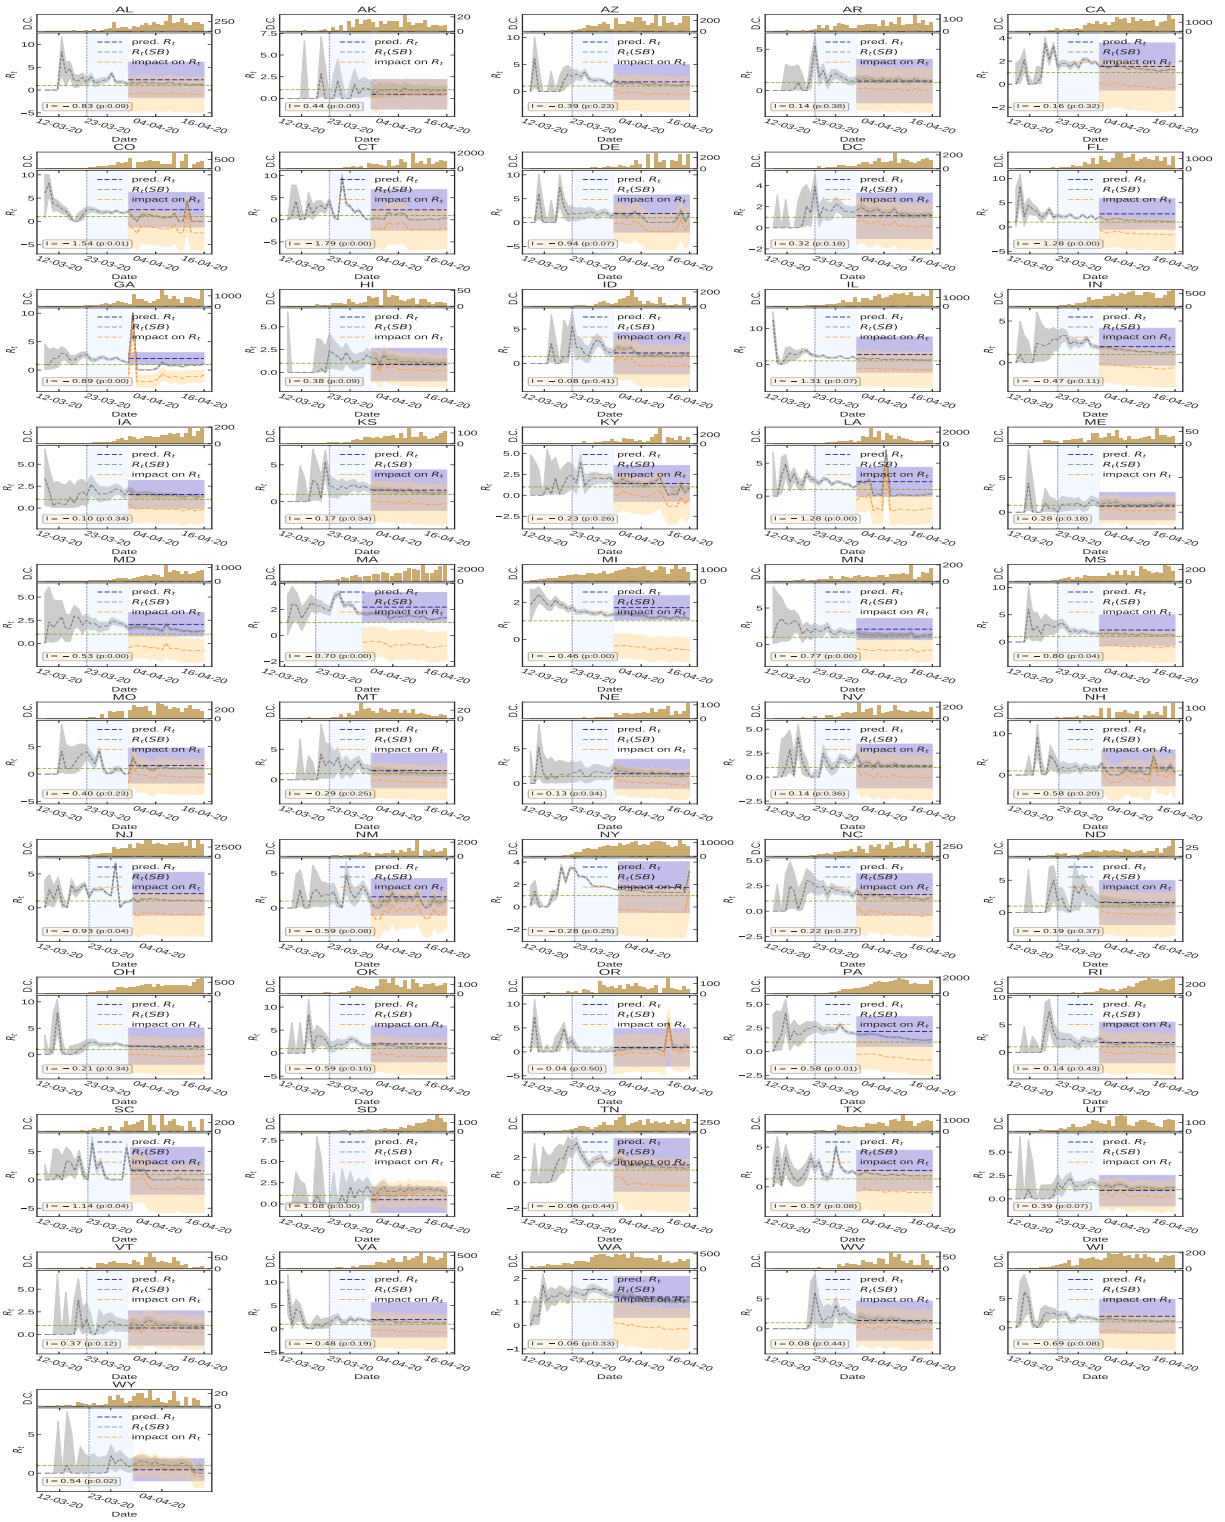

Figure S25: Impact of Governmental interventions on  $R_t$  in different administrative divisions of United States.
